# Supplementary material for: Antarctic Permafrost Degassing Revealed By Extensive Soil Gas and Co2 Flux Survey in Taylor Valley
Source: Research Square preprint supplement (doi:10.21203/rs.3.rs-1154287/v1), 2021-12-21
Supplement: Supplementary file 1 [file 64f94df3805f31a6d4c4c907.docx]

**Table S2.** Output of φCO2 measurements carried out at Taylor Valley, Antarctica. The total gas emission rates over the surveyed surface (21.6 km2) have been computed following the Chiodini and Frondini64 approach. Background values were not included.

| Population classes | average (g m-2d-1) |
| --- | --- |
| φCO2 | |
| 2-3 | 2.47 |
| 3-5 | 3.89 |
| >5 | 6.26 |
| **t d-1** | **14.95** |
